# Supplementary material for: Revealing the structure–activity relationship of two Cu-porphyrin-based metal–organic frameworks for the electrochemical CO2-to-HCOOH transformation
Source: Royal Society of Chemistry journal article supplement (doi:10.1039/d0dt02683b), 2020-01-01
Supplement: d0dt02683b1.pdf [file d0dt02683b1.pdf]

## Supplementary Information

# Revealing the Structure-Activity Relationship of Two Copper-porphyrin-based Metal-Organic Frameworks for the Electrochemical CO<sub>2</sub>-to-HCOOH Transformation

Meng-Jie Liu<sup>1</sup>, Si-Min Cao<sup>1</sup>, Bao-Qi Feng, Bao-Xia Dong\*, Yan-Xia Ding, Qiu-Hui Zheng,  
Yun-Lei Teng\*, Zong-Wei Li, Wen-Long Liu, Li-Gang Feng

*School of Chemistry and Chemical Engineering, Yangzhou University, Yangzhou 225002, Jiangsu,  
China*

\*Corresponding authors.

*E-mail addresses:* [bxdong@yzu.edu.cn](mailto:bxdong@yzu.edu.cn) (B-X. Dong), [ylteng@yzu.edu.cn](mailto:ylteng@yzu.edu.cn) (Y.-L. Teng)

<sup>1</sup> These authors contributed equally to this work.

- 1. Figure S1.** The molecular structure of the Cu-TCPP ligand.
- 2. Table S1.** Structural comparisons between PCN-222(Cu) and PCN-224(Cu)
- 3. Figure S2.** IR spectrum of each catalyst.
- 4. Figure S3.** UV-vis spectrum of each catalyst in CH<sub>2</sub>Cl<sub>2</sub>.
- 5. Figure S4.** CVs of (a) PCN-222(Cu)/C and (b) PCN-224(Cu)/C loaded on CP in N<sub>2</sub> and CO<sub>2</sub>-saturated electrolyte (vs. Ag/AgCl).
- 6. Figure S5.** CVs and peak current intensity variations of (a) PCN-222(Cu)/C and (b) PCN-224(Cu)/C in a CO<sub>2</sub>-saturated electrolyte as the scan rate is systematically increased from 0.02 to 0.5 V/s; Dependence of cathodic and anodic peak currents of the Cu<sup>II/I</sup> redox waves versus the scan rate, (c) PCN-222(Cu)/C, (d) PCN-224(Cu)/C.
- 7. Table S2.** The surface concentration (*Γ*) of the electroactive substance and the utilization percentage of Cu-TCPP, PCN-222(Cu) and PCN-224(Cu)
- 8. Figure S6.** Comparisons of CVs for bare CP electrode, carbon black, Cu-TCPP/C, PCN-222(Cu)/C, and PCN-224(Cu)/C loaded on the CP electrode in CO<sub>2</sub>-saturated electrolyte in the potential range -1.4 ~ 1.2 V vs. RHE.
- 9. Table S3.** Chronoamperograms and product quantified result for PCN-222(Cu)/C
- 10. Table S4.** Chronoamperograms and product quantified result for PCN-224(Cu)/C
- 11. Table S5.** Chronoamperograms and product quantified result for Cu-TCPP/C
- 12. Table S6.** Correlated data in references for clarifying the CO<sub>2</sub> capture ability
- 13. Figure S7.** Gas cycling experiment for Cu-TCPP catalyst under a pure CO<sub>2</sub> and N<sub>2</sub> flow at a constant temperature of 303 K for 10 cycles.
- 14. Table S7.** The obtained R<sub>cell</sub> and R<sub>ct</sub> in each catalyst

- 15. Figure S8.** CV curves of (a) PCN-222(Cu); (b) PCN-224(Cu); (c) Cu-TCPP in the region of  $-0.8 \sim -0.9$  V vs. Ag/AgCl at various scan rate ( $5 \sim 40$  mV/s); (d) Current density plots at various scan rates.
- 16. Figure S9.** (a) Steady-state current density and (b) the selectivity for each gas product in a potential range from  $-0.4$  to  $-0.9$  V vs. RHE of PCN-222(Cu)/C, PCN-224(Cu)/C and Cu-TCPP/C.
- 17. Table S8.** Long-term chronoamperograms and product quantified results for three catalysts
- 18. Table S9.** Performance of some Cu-related electrocatalysts in reference for transformation of  $\text{CO}_2$  to HCOOH
- 19. Figure S10.** Chromatographic peak and standard curve for pure hydrogen and CO established on TDX-01 column for GC analysis.
- 20. Figure S11.** Chromatographic peaks and standard curves for pure methanol and ethanol established on PEG-20M column for GC analysis.
- 21. Figure S12.** Chromatographic peak and standard curve for  $\text{COOH}^-$  established on high-end ion chromatography.

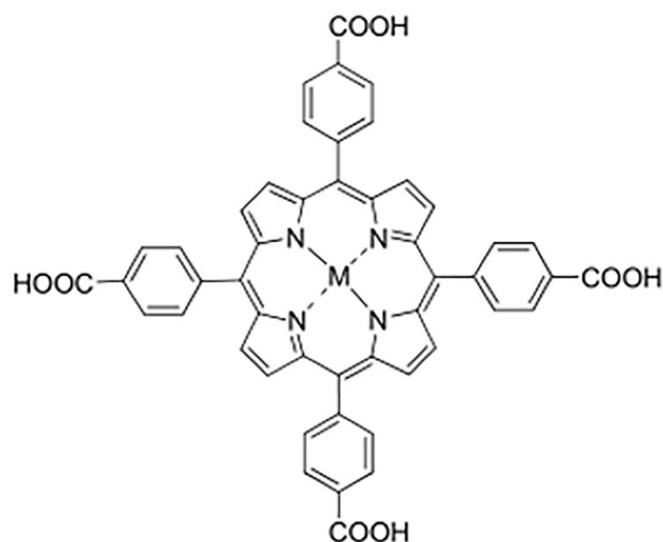

**Figure S1.** The molecular structure of the Cu-TCPP ligand.

**Table S1.** Structural comparisons between PCN-222(Cu) and PCN-224(Cu)

| Name                               | PCN-222(Cu)                                            | PCN-224(Cu)                                                   |
|------------------------------------|--------------------------------------------------------|---------------------------------------------------------------|
| Molecular formula                  | $\text{Zr}_6\text{O}_8(\text{OH})_8[\text{TCPP-Cu}]_2$ | $\text{Zr}_6\text{O}_{12}(\text{OH})_8[\text{TCPP-Cu}]_{1.5}$ |
| M ( $\text{g mol}^{-1}$ )          | 2516.03                                                | 2139.74                                                       |
| n (mol) for 10 mg                  | $3.97 \times 10^{-6}$                                  | $4.67 \times 10^{-6}$                                         |
| $\text{Zr}_6$ : Cu-TCPP            | 1:2                                                    | 1:1.5                                                         |
| BET ( $\text{m}^2 \text{g}^{-1}$ ) | 1900 (reported value of 2312)                          | 1690 (reported value of 2285)                                 |
| Pore diameter (nm)                 | 1.2, 3.2                                               | 1.3, 1.6                                                      |

|                                      |                               |                                 |
|--------------------------------------|-------------------------------|---------------------------------|
| V (cm <sup>3</sup> g <sup>-1</sup> ) | 1.18 (reported value of 1.39) | 1.107 (reported value of 1.095) |
| Color and shape                      | red, needle                   | red, cubic                      |
| Crystal system                       | hexagonal system              | cubic system                    |
| Cell parameters                      | $a=b=41.968(7)$ Å             | $a=b=c=38.512(2)$ Å             |
|                                      | $c=17.143(2)$ Å               |                                 |
|                                      | $\alpha=\beta=90^\circ$       |                                 |
|                                      | $\gamma=120^\circ$            |                                 |
| Space groups                         | $P6/mmm$                      | $Im-3m$                         |
| Z                                    | 6                             | 4                               |

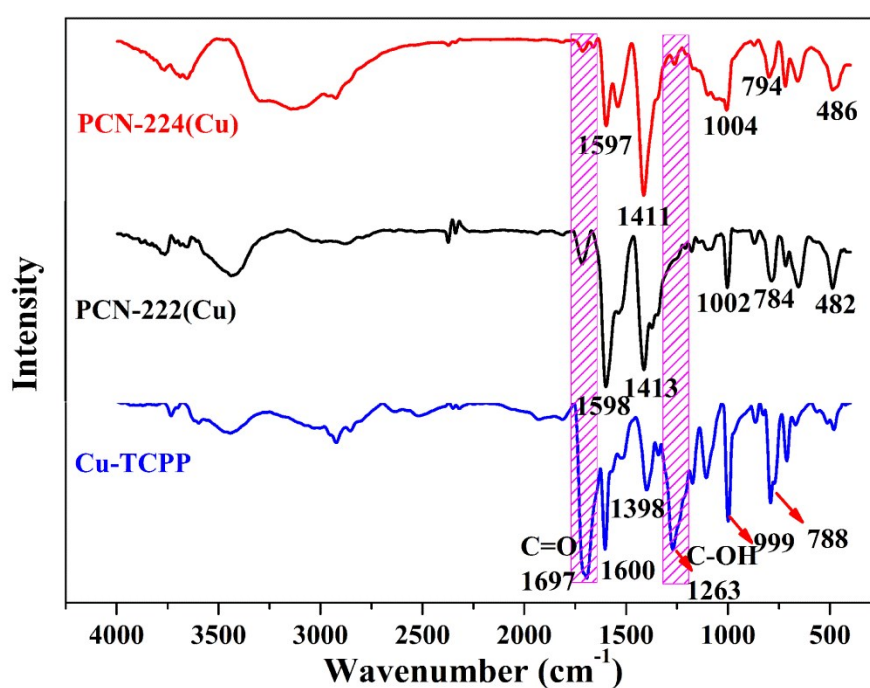

Figure S2. IR spectrum of each catalyst.

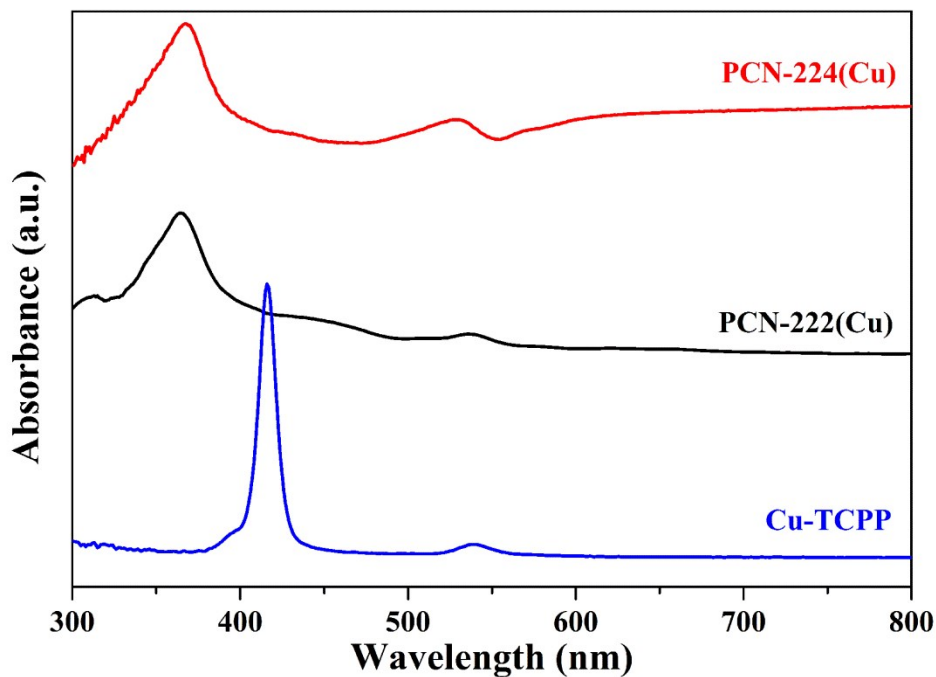

Figure S3. UV-vis spectrum of each catalyst in  $\text{CH}_2\text{Cl}_2$ .

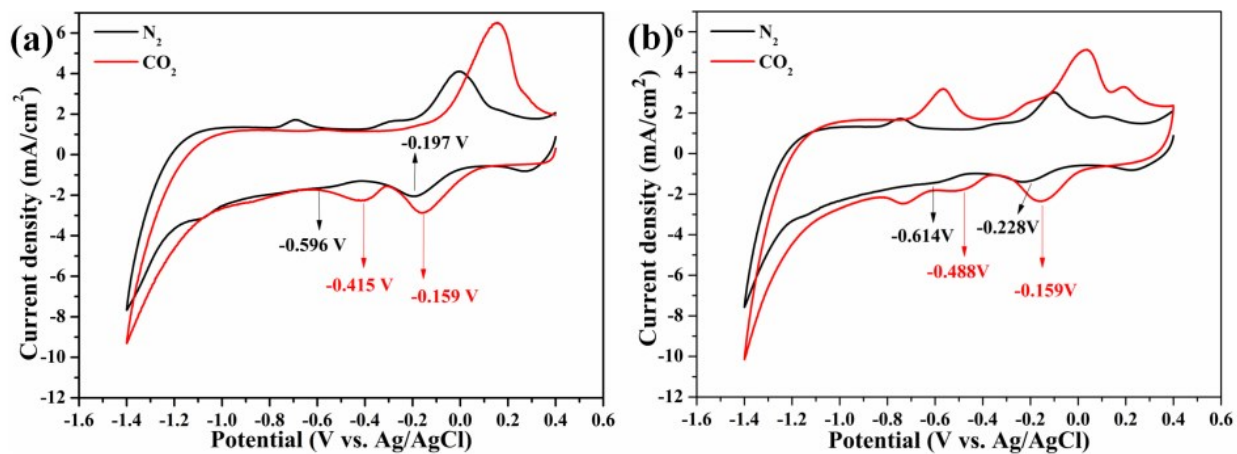

Figure S4. CVs of (a) PCN-222(Cu)/C and (b) PCN-224(Cu)/C loaded on CP in  $\text{N}_2$  and  $\text{CO}_2$ -saturated electrolyte (vs. Ag/AgCl).

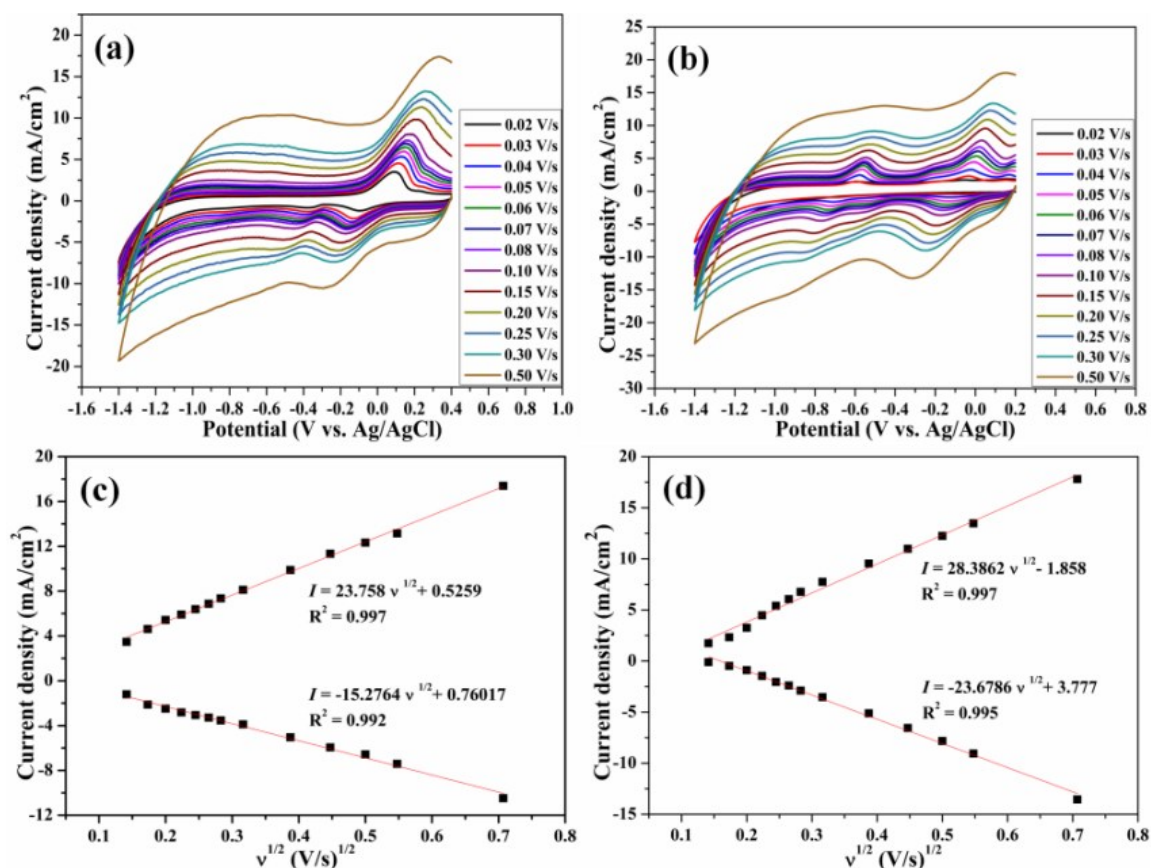

**Figure S5.** CVs and peak current intensity variations of (a) PCN-222(Cu)/C and (b) PCN-224(Cu)/C in a CO<sub>2</sub>-saturated electrolyte as the scan rate is systematically increased from 0.02 to 0.5 V/s; Dependence of cathodic and anodic peak currents of the Cu<sup>II/I</sup> redox waves versus the scan rate, (c) PCN-222(Cu)/C, (d) PCN-224(Cu)/C.

**Table S2.** The surface concentration ( $\Gamma$ ) of the electroactive substance and the utilization percentage of Cu-TCPP, PCN-222(Cu) and PCN-224(Cu)

|                                  | Cu-TCPP               | PCN-222(Cu)           | PCN-224(Cu)           |
|----------------------------------|-----------------------|-----------------------|-----------------------|
| n (mol)                          | $2.35 \times 10^{-6}$ | $7.95 \times 10^{-7}$ | $9.35 \times 10^{-7}$ |
| $\Gamma$ (mol cm <sup>-2</sup> ) | $2.38 \times 10^{-8}$ | $3.16 \times 10^{-8}$ | $2.86 \times 10^{-8}$ |
| Utilization percentage (%)       | 2.02                  | 7.95                  | 6.12                  |

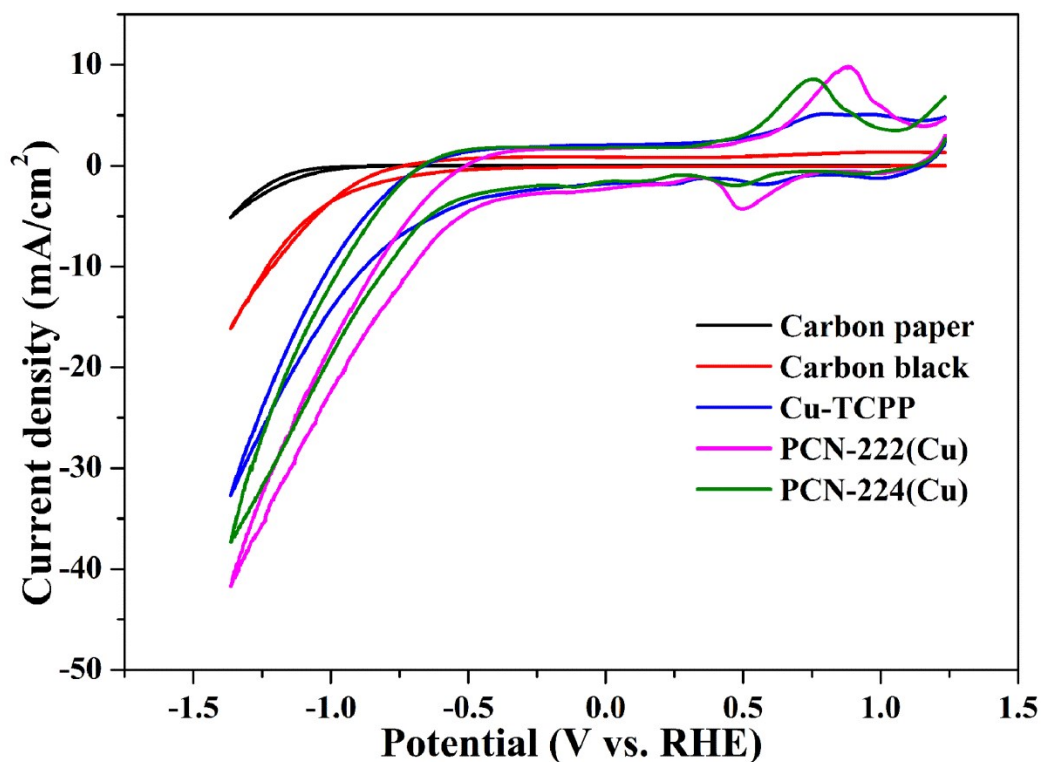

**Figure S6.** Comparisons of CVs for bare CP electrode, carbon black, Cu-TCPP/C, PCN-222(Cu)/C, and PCN-224(Cu)/C loaded on the CP electrode in CO<sub>2</sub>-saturated electrolyte in the potential range  $-1.4 \sim 1.2$  V vs. RHE.

**Table S3.** Chronoamperograms and product quantified result for PCN-222(Cu)/C

|                                 | PCN-222(Cu)/C         |                       |                       |                       |                       |                       |
|---------------------------------|-----------------------|-----------------------|-----------------------|-----------------------|-----------------------|-----------------------|
| vs. Ag/AgCl (V)                 | -1.035                | -1.135                | -1.235                | -1.335                | -1.435                | -1.535                |
| vs. RHE (V)                     | -0.4                  | -0.5                  | -0.6                  | -0.7                  | -0.8                  | -0.9                  |
| $\eta_{\text{HCOOH}}$ (mV)      | 150                   | 250                   | 350                   | 450                   | 550                   | 650                   |
| $j$ (mA cm <sup>-2</sup> )      | 0.16                  | 0.69                  | 1.24                  | 3.22                  | 5.87                  | 9.53                  |
| Q (C)                           | 2.269                 | 9.898                 | 17.81                 | 46.31                 | 84.48                 | 137.3                 |
| FE <sub>H<sub>2</sub></sub> (%) | 58.97                 | 62.51                 | 54.8                  | 50.67                 | 65.21                 | 71.56                 |
| FE <sub>CO</sub> (%)            | 14.17                 | 8.95                  | 3.18                  | 5.2                   | 2.85                  | 2                     |
| C <sub>HCOOH</sub> (ppm)        | 0.93                  | 7.407                 | 21.685                | 81.48                 | 108.31                | 148.07                |
| FE <sub>HCOOH</sub> (%)         | 10.31                 | 18.82                 | 30.62                 | 44.25                 | 32.24                 | 27.12                 |
| n <sub>HCOOH</sub> (mol)        | $1.21 \times 10^{-6}$ | $9.66 \times 10^{-6}$ | $2.83 \times 10^{-5}$ | $1.06 \times 10^{-4}$ | $1.41 \times 10^{-4}$ | $1.93 \times 10^{-4}$ |
| TON (n <sub>HCOOH</sub> /n)     | 1.52                  | 12.15                 | 35.6                  | 133.33                | 177.36                | 242.77                |
| TOF (h <sup>-1</sup> )          | 0.76                  | 6.08                  | 17.8                  | 66.67                 | 88.68                 | 121.39                |

**Table S4.** Chronoamperograms and product quantified result for PCN-224(Cu)/C

|                                 | PCN-224(Cu)/C        |                       |                      |                      |                       |                       |
|---------------------------------|----------------------|-----------------------|----------------------|----------------------|-----------------------|-----------------------|
| vs. Ag/AgCl (V)                 | -1.035v              | -1.135v               | -1.235v              | -1.335v              | 1.435v                | 1.535v                |
| vs. RHE (V)                     | -0.4                 | -0.5                  | -0.6                 | -0.7                 | -0.8                  | -0.9                  |
| $\eta_{\text{HCOOH}}$ (mV)      | 150                  | 250                   | 350                  | 450                  | 550                   | 650                   |
| $j$ (mA cm <sup>-2</sup> )      | 0.181                | 0.651                 | 1.22                 | 2.376                | 2.91                  | 6.775                 |
| Q (C)                           | 2.602                | 9.371                 | 17.5                 | 34.21                | 41.85                 | 97.56                 |
| FE <sub>H<sub>2</sub></sub> (%) | 51.78                | 58.04                 | 56.61                | 59.78                | 73.49                 | 67.24                 |
| C <sub>HCOOH</sub> (ppm)        | 1.383                | 8.944                 | 22.195               | 46.43                | 34.61                 | 103.92                |
| FE <sub>HCOOH</sub> (%)         | 13.37                | 24                    | 31.9                 | 34.14                | 20.8                  | 26.79                 |
| n <sub>HCOOH</sub> (mol)        | 1.8×10 <sup>-6</sup> | 1.17×10 <sup>-5</sup> | 2.9×10 <sup>-5</sup> | 6.1×10 <sup>-5</sup> | 4.51×10 <sup>-5</sup> | 1.36×10 <sup>-4</sup> |
| TON (n <sub>HCOOH</sub> /n)     | 1.93                 | 12.51                 | 31.02                | 65.24                | 48.24                 | 145.45                |
| TOF (h <sup>-1</sup> )          | 0.97                 | 6.26                  | 15.51                | 32.62                | 24.12                 | 72.73                 |

**Table S5.** Chronoamperograms and product quantified result for Cu-TCPP/C

|                                 | Cu-TCPP/C |                      |                       |                       |                       |                    |
|---------------------------------|-----------|----------------------|-----------------------|-----------------------|-----------------------|--------------------|
| vs. Ag/AgCl (V)                 | -1.035    | -1.135               | -1.235                | -1.335                | -1.435                | -1.535             |
| vs. RHE (V)                     | -0.4      | -0.5                 | -0.6                  | -0.7                  | -0.8                  | -0.9               |
| $\eta_{\text{HCOOH}}$ (mV)      | 150       | 250                  | 350                   | 450                   | 550                   | 650                |
| $j$ (mA cm <sup>-2</sup> )      | 0.11      | 0.37                 | 0.73                  | 2.185                 | 3.03                  | 5.385              |
| Q (C)                           | 1.581     | 5.321                | 10.53                 | 31.47                 | 43.65                 | 77.55              |
| FE <sub>H<sub>2</sub></sub> (%) | 32.83     | 61.34                | 63.08                 | 41.64                 | 61.86                 | 70.51              |
| FE <sub>CO</sub> (%)            | \         | \                    | \                     | 0.82                  | 2.24                  | 1.18               |
| C <sub>HCOOH</sub> (ppm)        | \         | 2.685                | 7.27                  | 35.52                 | 47.23                 | 77.4               |
| FE <sub>HCOOH</sub> (%)         | \         | 12.69                | 17.36                 | 28.38                 | 27.21                 | 25.1               |
| n <sub>HCOOH</sub> (mol)        | \         | 3.5×10 <sup>-6</sup> | 9.48×10 <sup>-6</sup> | 4.63×10 <sup>-5</sup> | 6.16×10 <sup>-5</sup> | 1×10 <sup>-4</sup> |
| TON (n <sub>HCOOH</sub> /n)     | \         | 1.49                 | 4.03                  | 19.7                  | 26.21                 | 42.55              |
| TOF (h <sup>-1</sup> )          | \         | 0.75                 | 2.02                  | 9.85                  | 13.11                 | 21.28              |

**Table S6.** Correlated data in references for clarifying the CO<sub>2</sub> capture ability

|                                                                  | PCN-222-H <sub>2</sub> <sup>1</sup> | PCN-224-Zn <sup>2</sup> |
|------------------------------------------------------------------|-------------------------------------|-------------------------|
| BET surface area (m <sup>2</sup> g <sup>-1</sup> )               | 1728                                | 1638.9                  |
| CO <sub>2</sub> uptake (273K) (cm <sup>3</sup> g <sup>-1</sup> ) | 58                                  | 38.3                    |
| CO <sub>2</sub> uptake (298K) (cm <sup>3</sup> g <sup>-1</sup> ) | 35                                  | 24.7                    |
| Heat of adsorption (kJ mol <sup>-1</sup> )                       | 23.6                                | 36.8                    |



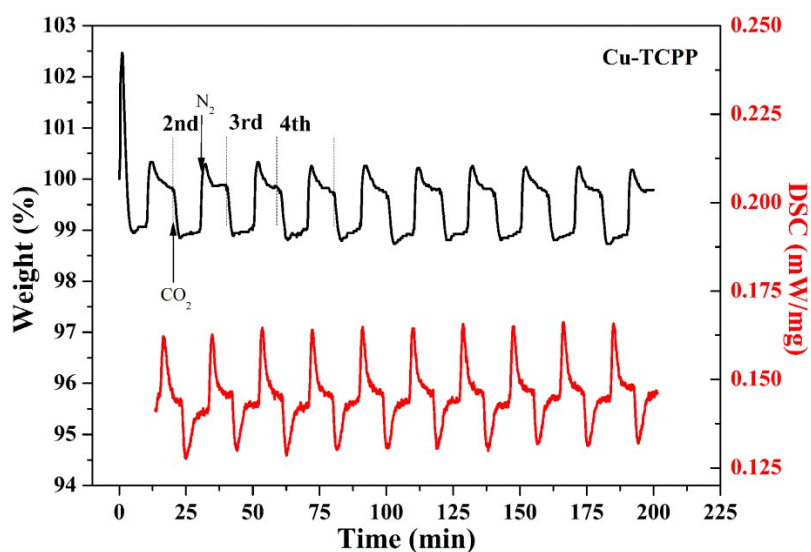

**Figure S7.** Gas cycling experiment for Cu-TCPP catalyst under a pure CO<sub>2</sub> and N<sub>2</sub> flow at a constant temperature of 303 K for 10 cycles.

**Table S7.** The obtained  $R_{\text{cell}}$  and  $R_{\text{ct}}$  in each catalyst

|                                           | PCN-222(Cu)/C | PCN-224 (Cu)/C | Cu-TCPP/C |
|-------------------------------------------|---------------|----------------|-----------|
| $R_{\text{cell}}$                         | 4.248         | 4.587          | 4.399     |
| $R_{\text{CT}}$                           | 10.23         | 10.13          | 15.75     |
| $C_{\text{dl}}$ ( $\mu\text{F cm}^{-2}$ ) | 21.2          | 17.8           | 15.9      |
| $\text{ECSA}$ ( $\text{cm}^2$ )           | 1.06          | 0.89           | 0.79      |

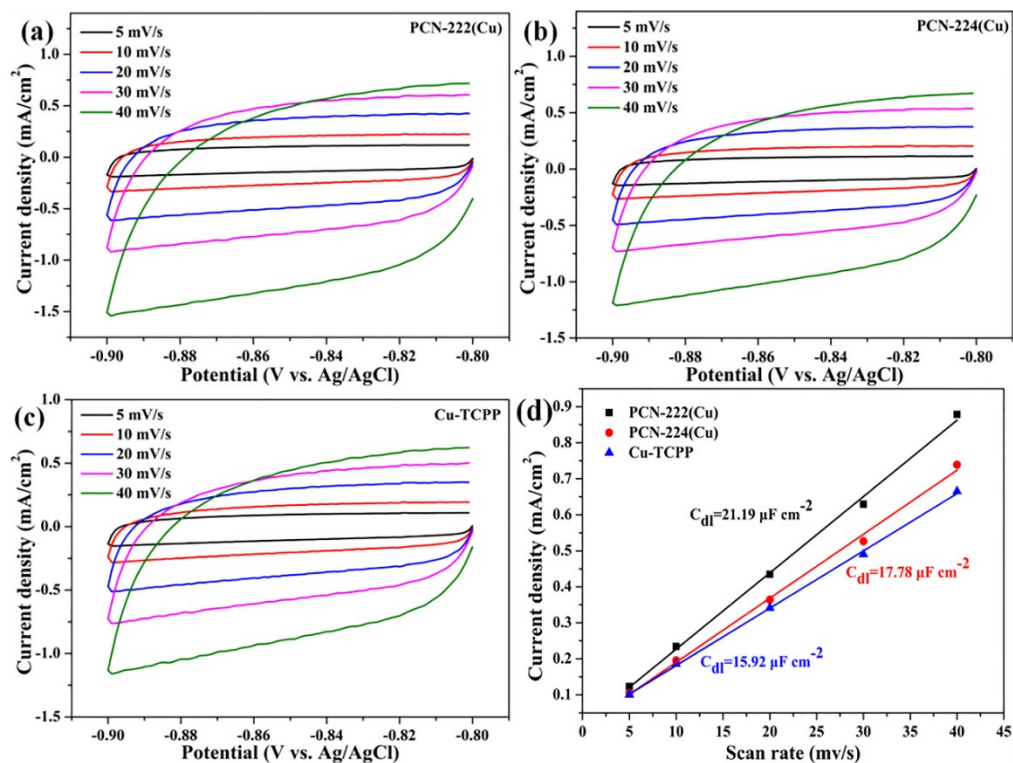



**Figure S8.** CV curves of (a) PCN-222(Cu); (b) PCN-224(Cu); (c) Cu-TCPP in the region of  $-0.8 \sim -0.9$  V vs. Ag/AgCl at various scan rate (5 ~ 40 mV/s); (d) Current density plots at various scan rates.

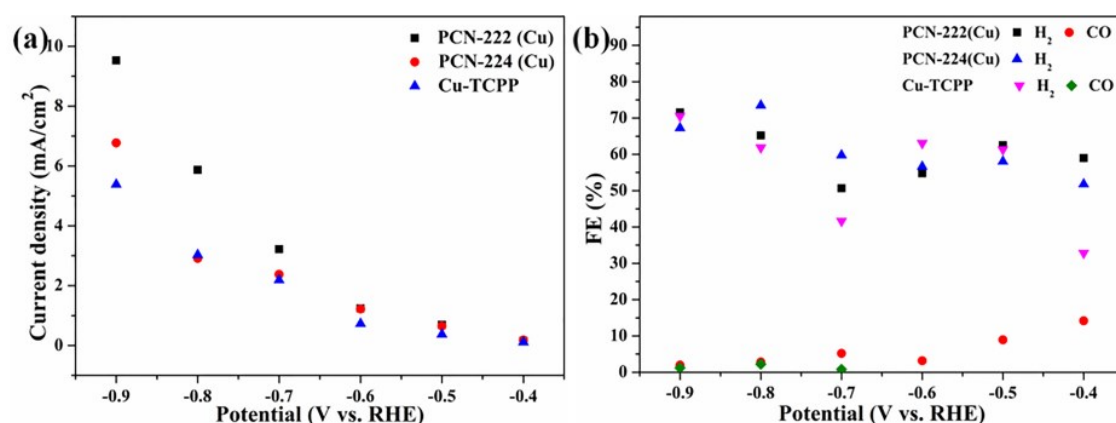

**Figure S9.** (a) Steady-state current density and (b) the selectivity for each gas product in a potential range from  $-0.4$  to  $-0.9$  V vs. RHE of PCN-222(Cu)/C, PCN-224(Cu)/C and Cu-TCPP/C.

**Table S8.** Long-term chronoamperograms and product quantified results for three catalysts

| Catalyst                        | PCN-222(Cu) | PCN-224(Cu) | Cu-TCPP | PCN-222(Cu) | PCN-224(Cu) | Cu-TCPP |
|---------------------------------|-------------|-------------|---------|-------------|-------------|---------|
| $t$ (h)                         |             | 2           |         |             | 10          |         |
| $Q$ (C)                         | 46.3        | 34.2        | 31.5    | 199.3       | 144.3       | 90.2    |
| $j$ (mA cm <sup>-2</sup> )      | 3.2         | 2.4         | 2.2     | 2.8         | 2.0         | 1.3     |
| FE <sub>HCOOH</sub> (%)         | 44.3        | 34.1        | 28.4    | 34.6        | 34.9        | 23.8    |
| FE <sub>H<sub>2</sub></sub> (%) | 50.7        | 59.8        | 41.6    | 51.9        | 58.1        | 60.7    |
| FE <sub>CO</sub> (%)            | 5.2         | \           | 0.8     | 11.3        | \           | 0.8     |

**Table S9.** Performance of some Cu-related electrocatalysts in reference for transformation of CO<sub>2</sub> to HCOOH

| Catalyst                 | Electrolyte              | Product | Potential [overpotential (V)] | $j$ (mA cm <sup>-2</sup> ) | FE (%) | Ref       |
|--------------------------|--------------------------|---------|-------------------------------|----------------------------|--------|-----------|
| PCN-222(Cu)              | 0.5 M KHCO <sub>3</sub>  | HCOOH   | $-0.70$ V vs. RHE             | 3.2                        | 44.25  | This work |
| PCN-224(Cu)              |                          |         | [0.45]                        | 2.4                        | 34.14  |           |
| CR-MOF                   | 0.5 M KHCO <sub>3</sub>  | HCOOH   | $-1.20$ V vs. SHE [0.54]      |                            | 30     | 3         |
| Cu-SIM NU-1000 thin film | 0.1 M NaClO <sub>4</sub> | HCOOH   | $-0.82$ V vs. RHE             | 1.2                        | 28     | 4         |

|                                              |                                                                                              |       |                                         |      |      |    |
|----------------------------------------------|----------------------------------------------------------------------------------------------|-------|-----------------------------------------|------|------|----|
| [Cu(cyclam)](ClO <sub>4</sub> ) <sub>2</sub> | 0.1 M<br>Bu <sub>4</sub> NBF <sub>4</sub> /DMF/H <sub>2</sub> O                              | HCOOH | -2.0 V vs. Fc/Fc <sup>+</sup><br>[0.54] | 1    | 90   | 5  |
| Cu nanofoams                                 | 0.5 M NaHCO <sub>3</sub>                                                                     | HCOOH | -1.50 V vs. Ag/AgCl                     |      | 37   | 6  |
| Hierarchical Cu pillar                       | 0.1 M KHCO <sub>3</sub>                                                                      | HCOOH | -0.50 V vs. RHE<br>[0.68]               | ~1.3 | 28.7 | 7  |
| Nano CuO                                     | 0.5 M KHCO <sub>3</sub>                                                                      | HCOOH | -1.40 V vs. Ag/AgCl                     |      | 61   | 8  |
| Amorphous Cu NPs                             | 0.1 M KHCO <sub>3</sub>                                                                      | HCOOH | -1.40 V vs. Ag/AgCl                     | ~6   | 37   | 9  |
| Cu-Pc                                        | 0.5 M KHCO <sub>3</sub>                                                                      | HCOOH | -0.86 V vs. RHE                         |      | 25   | 10 |
| Cu <sub>2</sub> (CuTCPP)                     | CH <sub>3</sub> CN solution with<br>1 M<br>H <sub>2</sub> O and 0.5 M<br>EMIMBF <sub>4</sub> | HCOOH | -1.55V vs. Ag/Ag <sup>+</sup>           | ~3   | 68.4 | 11 |
| MOF-derived OD<br>Cu/C-1000                  | 0.1 M KHCO <sub>3</sub>                                                                      | HCOOH | -0.5 V vs. RHE<br>[0.25]                |      | 18   | 12 |
| Cu foil                                      | 0.1 M KCl                                                                                    | HCOOH | -1.44 V vs. NHE                         |      | 6.6  | 13 |
| Cu foil                                      | 0.1 M KHCO <sub>3</sub>                                                                      | HCOOH | -1.41 V vs. NHE                         |      | 9.7  | 14 |
| Cu <sub>2</sub> O-derived Cu<br>electrode    |                                                                                              |       | -0.78 V vs. RHE<br>[0.53]               | 6.37 | 25   |    |
| Cu (100)                                     |                                                                                              |       | -0.85 V vs. RHE<br>[0.6]                | 0.97 | 9    |    |
| Cu (111)                                     | 0.1 M KHCO <sub>3</sub>                                                                      | HCOOH | -0.95 V vs. RHE<br>[0.7]                | 1.18 | 20.8 | 15 |
| Cu (110)                                     |                                                                                              |       | -0.80 V vs. RHE<br>[0.55]               | 1.1  | 24.7 |    |
| Cu <sub>2</sub> O/Cu annealed at<br>500°C    | 0.1 M KHCO <sub>3</sub>                                                                      | HCOOH | -0.45 V vs. RHE<br>[0.25]               | 0.6  | 33   | 16 |
| CuO nanowires                                | 0.5 M KHCO <sub>3</sub>                                                                      | HCOOH | -1.5 V vs. Ag/AgCl<br>[0.597]           | 80   | 38   | 17 |
| Cu nanoparticles/o-<br>CNT-NW(1%)            | 0.5 M KHCO <sub>3</sub>                                                                      | HCOOH | -2.0 V vs. Ag/AgCl<br>[1.097]           |      | 27.5 | 18 |
| Cu-CDots nanocorals                          | 0.5 M KHCO <sub>3</sub>                                                                      | HCOOH | -0.7 V vs. RHE<br>[0.45]                | 4.2  | 79   | 19 |
| Cu NWs-Bi NSs                                | 0.5 M KHCO <sub>3</sub>                                                                      | HCOOH | -0.86 V vs. RHE                         | ~6.2 | 87   | 20 |
| <i>in situ</i> -treated Bi/Cu<br>foam        | 0.1 M KHCO <sub>3</sub>                                                                      | HCOOH | -1.6 V vs. Ag/AgCl                      | 10   | 92   | 21 |
| Sn-Cu alloy                                  | 0.5 M KCl                                                                                    | HCOOH | -1.14 V vs. RHE                         | ~100 | 82   | 22 |
| G-Cu <sub>x</sub> O-2h                       | 0.5 M KHCO <sub>3</sub>                                                                      | HCOOH | -0.8 V vs. RHE                          | 19.3 | 81   | 23 |
| Bi-SnO/Cu foam                               | 0.1 M KHCO <sub>3</sub>                                                                      | HCOOH | -1.7 V vs. Ag/AgCl                      | 12   | 93   | 24 |
| Cu <sub>25</sub> In <sub>75</sub>            | 0.5 M NaHCO <sub>3</sub>                                                                     | HCOOH | -0.7 V vs. RHE                          | 5.3  | 84.1 | 25 |
| CuZn-0.5                                     | 0.1 M KHCO <sub>3</sub>                                                                      | HCOOH | -1.1 V vs. RHE                          | 4.5  | ~60  | 26 |
| PTFE-Cu NW                                   | 0.1 M KHCO <sub>3</sub>                                                                      | HCOOH | -0.6 V vs. RHE                          | ~7.6 | 68   | 27 |
| Pb <sub>ed</sub> /Cu NWs                     | 0.5 M KHCO <sub>3</sub>                                                                      | HCOOH | -0.93 V vs. RHE                         | ~8.3 | 25   | 28 |

|                           |                         |       |                |      |    |    |
|---------------------------|-------------------------|-------|----------------|------|----|----|
| Pb <sub>air</sub> /Cu NWs |                         |       |                | 9.35 | 22 |    |
| nanoporous Zn-Cu          | 0.5 M KHCO <sub>3</sub> | HCOOH | -0.9 V vs. RHE | ~5.6 | 29 | 29 |

## Experimental Section

### Materials.

All chemicals used as received without further purification. The water used throughout all experiments was deionized with 18.2 MΩ from a Millipore system. Carbon monoxide (99.999%) and hydrogen (99.999%) were used for calibration.

### Preparation of the Electrodes.

MOFs of PCN-222(Cu) and PCN-224(Cu) and ligand of Cu-TCPP (Figure S1) were synthesized following a process described in the literature.<sup>30-31</sup> After a typical hydrothermal synthesis, red hexagonal prism-shaped crystals of PCN-222(Cu), and red cubic crystals of PCN-224(Cu) were collected by filtration. Carbon paper (99.5% carbon, 1 cm × 1 cm) was treated with 6.0 M HCl overnight to remove trace metal impurity, rinsed thoroughly with Milli-Q water, and dried in a vacuum before use. 10.0 mg ( $3.97 \times 10^{-6}$  mol) of PCN-222(Cu) and 20.0 mg carbon black (Vulcan XC-72R) were ultrasonically dispersed into 1.0 mL acetone (0.5 wt% Nafion) for 2 h to form a slurry. A 160 μL of the slurry was dropped on each surface of the carbon paper and then air-dried before use (loading of 3.0 mg cm<sup>-2</sup>). PCN-224(Cu)/C (10 mg,  $4.67 \times 10^{-6}$  mol of catalyst) and Cu-TCPP/C (10 mg,  $8.21 \times 10^{-6}$  mol of catalyst) electrodes were assembled according to the same procedure mentioned above.

### Electrochemistry and Product Analyses.

Electrochemical reduction of CO<sub>2</sub> was performed in an H-type cell with an Ag/AgCl reference electrode and Pt wire as the counter electrode. The cathode and anode compartments were separated by a cation exchange membrane (Nafion 117). 0.5 M (60 mL) KHCO<sub>3</sub> aqueous solution was used as the electrolyte. Before electrolysis, the electrolyte was pre-saturated with CO<sub>2</sub> by bubbling the gas for 30 min (pH 7.4). Current densities were calculated based on the geometric area of the working electrode. A CHI660E electrochemical workstation was used for the electrochemical studies.

Electrochemical behaviors were evaluated by the characterization of cyclic voltammetry and chronopotentiometry. All potentials were referred to a reversible hydrogen electrode (RHE).

The gas chromatograph (GC, SP-6890) is equipped with columns of TDX-01, GDX502, and PEG-20M, detectors of thermal conductivity detector (TCD) and flame ionization detector (FID) with Ar as a carrier gas. The gaseous products were drawn from the headspace by a gas-tight syringe and injected into the GC. H<sub>2</sub>, CO and CO<sub>2</sub> with significant amounts are detected by TCD. FID is used to detect a trace of hydrocarbon products. Standard curves for H<sub>2</sub> and CO are shown in Figure S10. Liquid phase products of methanol and ethanol were detected by the FID after eluting from the PEG-20M column (Figure S11). The liquid phase product of COOH<sup>-</sup> was quantified using a high-end ion chromatography system (ICS-2000, DIONEX). The standard curve for COOH<sup>-</sup> is shown in Figure S12.

Additional characterizations of the electrode were obtained with scanning electron microscopy (SEM) (S-4800II, Japan) and powder X-ray diffraction (PXRD) measurement (AXS D8 ADVANCE, Bruker, German). Low-pressure N<sub>2</sub> adsorption measurements (up to 1 bar) were performed on a Micromeritics ASAP 2020 HD88 surface area and a pore size analyzer. The surface elemental compositions of the samples were investigated by X-ray photoelectron spectroscopy (XPS, ESCALAB 250Xi, Thermo Scientific, America). The Fourier transform infrared spectra of the catalysts are collected on Vertex 70 v, Bruker. The UV absorption characteristics were measured on a Cary 5000 UV spectrophotometer. The CO<sub>2</sub> capture of each catalyst is tested by thermogravimetric analyzer (STA 449 F3).

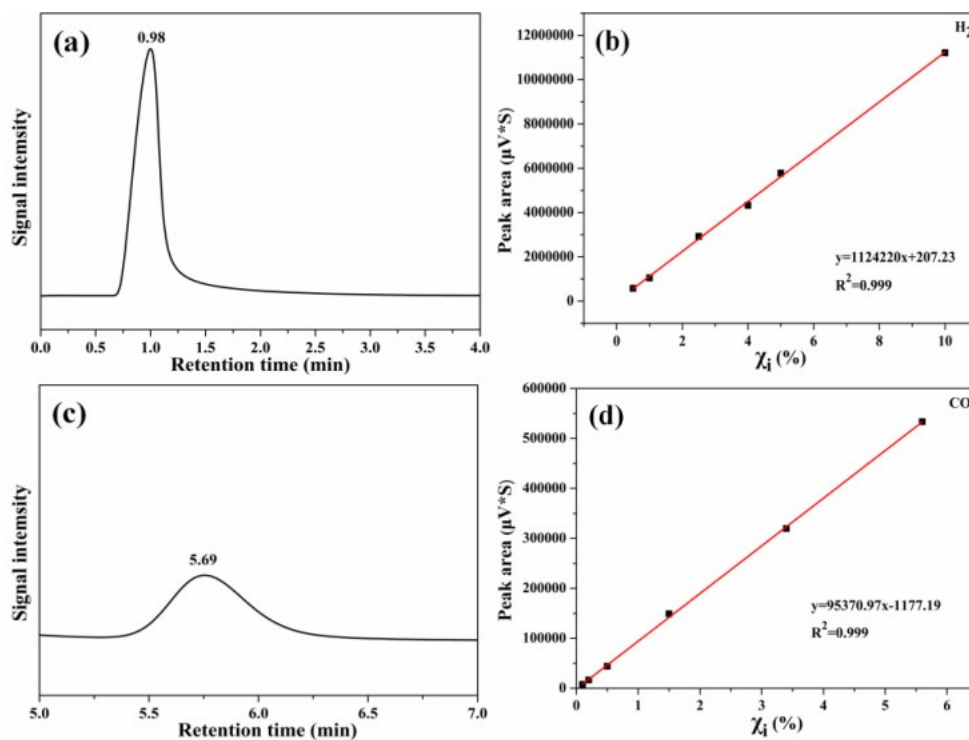

**Figure S10.** Chromatographic peak and standard curve for pure hydrogen and CO established on TDX-01 column for GC analysis.

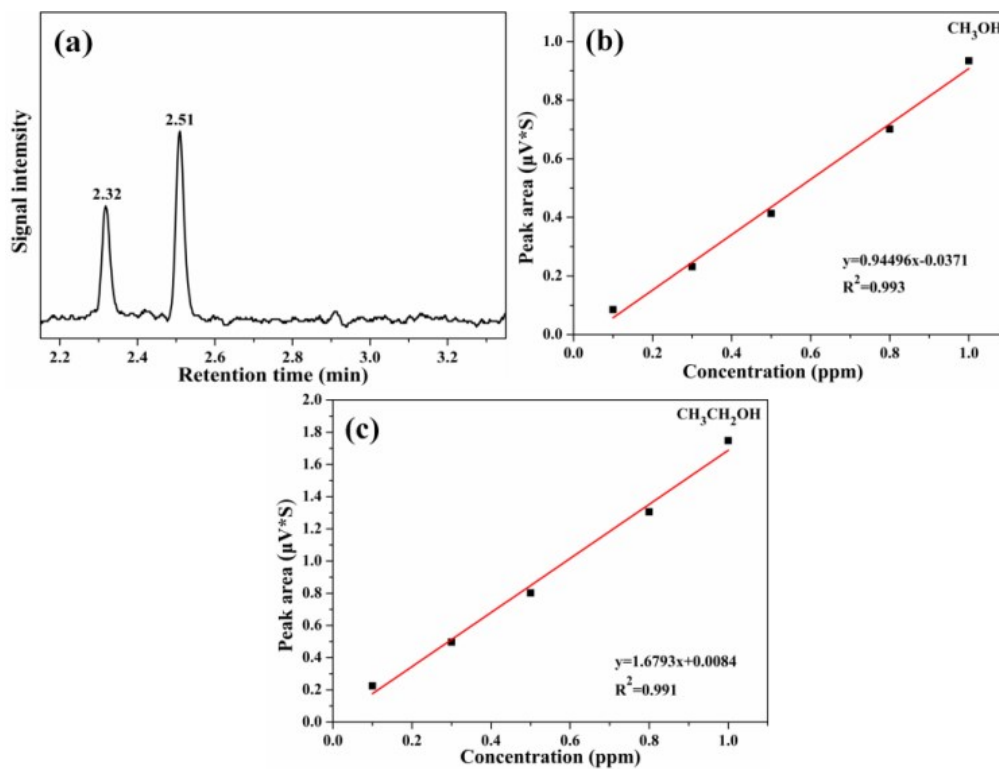

**Figure S11.** Chromatographic peaks and standard curves for pure methanol and ethanol established on PEG-20M column for GC analysis.

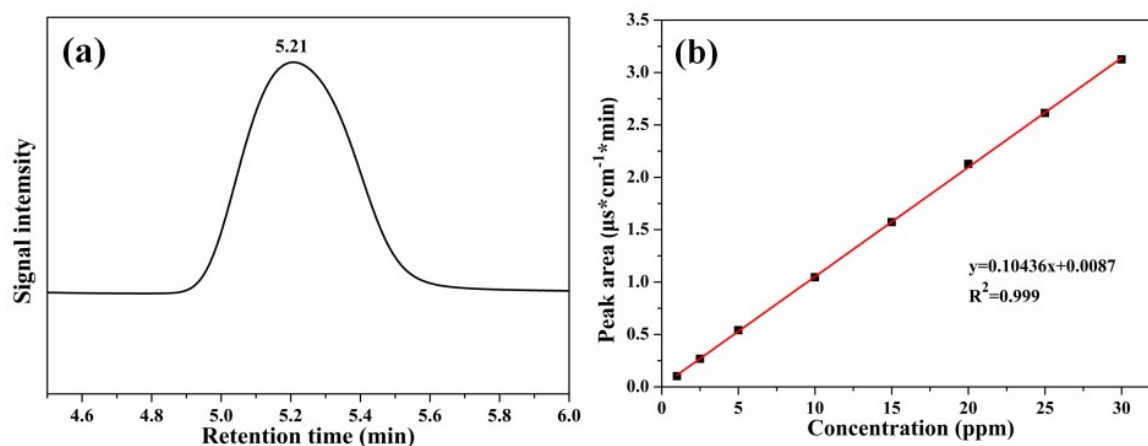

**Figure S12.** Chromatographic peak and standard curve for  $\text{COOH}^-$  established on high-end ion chromatography.

## References

- 1 H. Q. Xu, J. H. Hu, D. K. Wang, Z. H. Li, Q. Zhang, Y. Luo, S. H. Yu and H. L. Jiang, *J. Am. Chem. Soc.*, 2015, **137**, 13440–13443.
- 2 N. Sharma, S. S. Dhankhar and C. M. Nagaraja, *Sustain. Energy Fuels.*, 2019, **3**, 2977–2982.
- 3 R. Hinogami, S. Yotsuhashi, M. Deguchi, Y. Zenitani, H. Hashiba and Y. Yamada, *ECS Electrochem. Lett.*, 2012, **1**, H17–H19.
- 4 C. W. Kung, C. O. Audu, A. W. Peter, H. Noh, O. K. Farha and J. T. Hupp, *ACS Energy Lett.*, 2017, **2**, 2394–2401.
- 5 T. N. Huan, E. S. Andreiadis, J. Heidkamp, P. Simon, E. Derat, S. Cobo, G. Royal, A. Bergmann, P. Strasser, H. Dau, V. Artero and M. Fontecave, *J. Mater. Chem. A*, 2015, **3**, 3901–3907.
- 6 S. Sen, D. Liu and G. T. R. Palmore, *ACS Catal.*, 2014, **4**, 3091–3095.
- 7 J. Chung, D. H. Won, J. Koh, E. H. Kim, S. I. Woo, *Phys. Chem. Chem. Phys.*, 2016, **18**, 6252–6258.
- 8 K. Gupta, M. Bersani and J. A. Darr, *J. Mater. Chem. A*, 2016, **4**, 13786–13794.
- 9 Y. X. Duan, F. L. Meng, K. H. Liu, S. S. Yi, S. J. Li, J. M. Yan and Q. Jiang, *Adv. Mater.*, 2018, **30**, 1706194.
- 10 Z. Weng, Y. S. Wu, M. Y. Wang, J. B. Jiang, K. Yang, S. J. Huo, X. F. Wang, Q. Ma, G. W. Brudvig, V. S. Batista, Y. Y. Liang, Z. X. Feng and H. L. Wang, *Nat. Commun.*, 2018, **9**,

- 415–423.
- 11 J. X. Wu, S. Z. Hou, X. D. Zhang, M. Xu, H. F. Yang, P. S. Cao and Z. Y. Gu, *Chem. Sci.*, 2019, **10**, 2199.
- 12 K. Zhao, Y. M. Liu, X. Quan, S. Chen and H. T. Yu, *ACS Appl. Mater. Interfaces.*, 2017, **9**, 5302–5311.
- 13 Y. Hori, A. Murata, R. Takahashi and S. Suzuki, *J. Chem. Soc. Chem. Commun.*, 1988, **1**, 17–19.
- 14 Y. Hori, A. Murata and R. Takahashi, *J. Chem. Soc. Faraday Trans.*, 1989, **1**, **85**, 2309–2326.
- 15 Y. Huang, A. D. Handoko, P. Hirunsit and B. S. Yeo, *ACS Catal.*, 2017, **7**, 1749–1756.
- 16 C. W. Li and M. W. Kanan, *J. Am. Chem. Soc.*, 2012, **134**, 7231–7234.
- 17 P. Huang, S. Q. Ci, G. X. Wang, J. C. Jia, J. W. Xu and Z. H. Wen, *J. CO<sub>2</sub> UTIL.*, 2017, **20**, 27–33.
- 18 B. C. Marepally, C.; Ampelli, C. Genovese, F. Tavella, L. Veyre, E. A. Quadrelli, S. Perathoner and G. Centi, *J. CO<sub>2</sub> UTIL.*, 2017, **21**, 534–542.
- 19 S. J. Guo, S. Q. Zhao, J. Gao, C. Zhu, X. Q. Wu, Y. J. Fu, H. Huang, Y. Liu and Z. H. Kang, *Nanoscale.*, 2017, **9**, 298–304.
- 20 L. Li, F. F. Cai, F. X. Y. Qi and D. K. Ma, *J. Alloys Compod.*, 2020, **841**, 155789.
- 21 X. W. An, S. S. Li, X. Q. Hao, X. Du, T. Yu, Z. D. Wang, X. G. Hao, A. Abudula and G. Q. Guan, *Sustain. Energy Fuels*, 2020, **4**, 2831–2840.
- 22 K. Ye, A. Cao, J. Q. Shao, G. Wang, R. Si, N. Ta, J. Q. Xiao and G. X. Wang, *Sci. Bull.*, 2020, **65**, 711–719.
- 23 W. Ni, C. X. Li, X. G. Zang, M. Xu, S. L. Huo, M. Q. Liu, Z. Y. Yang and Y. M. Yan, *Appl. Catal. B*, 2019, **259**, 118044.
- 24 X. W. An, S. S. Li, A. Yoshida, T. Yu, Z. D. Wang, X. G. Hao, A. Abudula and G. Q. Guan, *ACS Appl. Mater. Interfaces*, 2019, **11**, 42114–42122.
- 25 M. H. Zhu, P. F. Tian, J. Y. Li, J. C. Chen, J. Xu and Y. F. Han, *Chem. Sus. Chem.*, 2019, **12**, 3955–3959.
- 26 S. Ajmal, Y. Yang, K. J. Li, M. A. Tahir, Y. Y. Liu, T. Wang, A. U. R. Bacha, Y. Q. Feng, Y. Deng and L. W. Zhang, *J. Phys. Chem. C*, 2019, **123**, 11555–11563.



- 27 Y. S. Zhang, Z. Cai, Y. X. Zhao, X. M. Wen, W. W. Xu, Y. Zhong, L. Bai, W. Liu, Y. Zhang, Y. Zhang, Y. Kuang and X. M. Sun, *Nanoscale Horiz.*, 2019, **4**, 490–494.
- 28 Y. T. Wang, H. J. Hu, Y. F. Sun, Y. Tang, L. M. Dai, Q. Hu, A. Fisher and X. J. Yang, *Adv. Mater. Interfaces*, 2018, **6**, 1801200.
- 29 H. J. Hu, Y. Tang, Q. Hu, P. Y. Wan, L. M. Dai and X. J. Yang, *Appl. Surf. Sci.*, 2018, **445**, 281–286.
- 30 D. W. Feng, W. C. Chung, Z. W. Wei, Z. Y. Gu, H. L. Jiang, Y. P. Chen, D. J. Darensbourg and H. C. Zhou, *J. Am. Chem. Soc.*, 2013, **135**, 17105–17110.
- 31 D. W. Feng, Z. Y. Gu, J. R. Li, H. L. Jiang, Z. W. Wei and H. C. Zhou, *Angew. Chem. Int. Ed.*, 2012, **124**, 10453–10456.
